# Supplementary material for: A secreted Botrytis cinerea stage-specific effector promotes virulence by targeting the plant ROS-generating machinery
Source: Research Square preprint supplement (doi:10.21203/rs.3.rs-4918366/v1), 2024-08-28
Supplement: Supplementary file 1 [file 2ab6fd1bf3c91d35aecd3acf.xlsx]

## Sheet: Sheet1
	BcCELP1 transient expression with native SP	BcCELP1-TE F:	ccatttacgaacgatagcatATGTATATTACCTCCCTTC
		BcCELP1-TE R:	ctcccccgggggtaccgtcgacggatccACTGATAGTACCATCACCG
	BcCELP1 transient expression without native SP	DSP-BcCELP1-TE F:	ccatttacgaacgatagcatATGGCCACAATCCCTCGCAACTT
		DSP-BcCELP1-TE R:	ctcccccgggggtaccgtcgacggatccACTGATAGTACCATCACCG
	CELP0028 domain transient expression	CELP domian-TE F:	ttcaccatttacgaacgatagcatatgTCCGCTCTCAGCAAGCGT
		CELP domain-TE R:	ctcccccgggggtaccgtcgacggatccACTGATAGTACCATCACCG
	Del-CELP0028 domain transient expression	Del-CELP domain-TE F:	tctagaATGTATATTACCTCCCTTC
		Del-CELP domain-TE R:	ggtaccTGATGCGTAGTGGCCAC
	BcCELP1C234AC244A transient expression	BcCELP1C234AC244A-TE F:	ccatttacgaacgatagcatATGTATATTACCTCCCTTC
		BcCELP1C234AC244A-TE R1:	ACTGATAGTACCATCACCGTTggcTTGTGGGACTGGGTAAGTGTCTGCAGTagcAAGAC
		BcCELP1C234AC244A-TE R2:	ctcccccgggggtaccgtcgacggatccACTGATAGTACCATCACCG
	BcCELP121-144 expression in E. coli	pET14b-BcCELP120-251 F:	AACCTGTACTTCCAGGGTCATATGGCCACAATCCCTCGCAACT
		pET14b-BcCELP120-251 R:	tcgggctttgttagcagccgTTAACTGATAGTACCATCAC
	Generate pET14b linearized vector skeleton for cloning	pET14b-GFP F:	CGGCTGCTAACAAAGCCCGAAAGG
		pET14b-GFP R：	CATATGACCCTGGAAGTACAGG
	BcCELP1 replacement vector upstream
	Amplify 5’flank of BcCELP1	pTZ-5'flankBcCELP1 F:	ggtaacgccagggttttcccagtcacgacgGGCGGAACATGGGGCTTAGAAATTTT
		hpy-5'flankBcCELP1 R:	cctttttttttcaggaattattctcacagtTTTGAAGATTTGAAAGTATTAACT
	BcCELP1 replacement vector downstream
	Amplify 3’flank of BcCELP1	hpy-3'flankBcCELP1 F:	gatctagatgcattcgcgaggtaccgagctGCGGGAAATGAGATTATCCTTGTGA
		pTZ-3'flankBcCELP1 R:	agcggataacaatttcacacaggaaacagcCCCTACAAAGTTGGGATTACCGAATT
	Amplify hph cassette	OliCprom-Hyg-pOnex F:	AGCTCGGTACCTCGCGAATGC
		ToACR R:	ACTGTGAGAATAATTCCTG
	Check BcCELP1 deletion	5'flank BcCELP1-check F:	TTGGGAGGATTGGAGATACGG
		3'flank BcCELP1-check R:	AAACTGCCACGTCCGTATCC
	To amplify part of the open reading frame of BcCELP1	BcCELP1-check F:	TTATCGGCTACAATGGAACCTCAGG
		BcCELP1-check R:	GTAAGTGTCTGCAGTGCAAAGACTG
		Opt-GFP-check R：	CGTCTCCCTCACCCTCTCCG
	BcCELP1 over-expression under control of PoliC	BcCELP1-OE F:	CCATCACATCACAATCGATCCAACCATGTATATTACCTCCCTTCTTTCC
		BcCELP1-OE R:	TACTTACCTCACCCTTGGAAACCATACTGATAGTACCATCACCGT
	BcCELP1-GFP fused protein under control of native BcCELP1 promoter	PtrpC-promoter of BcCrh1 F:	GCCCAAAAAATGCTCCTTCAATATCGTCCCCACGAAGTCTAAACTC
		Promoter of BcCrh1 R:	AAGAAGGGAGGTAATATACATTTTGAAGATTTGAAAGTATTAACT
		BcCrh1 F:	ATGTATATTACCTCCCTTCTTTCC
		BcCrh1-GFP-R:	TACTTACCTCACCCTTGGAAACCATACTGATAGTACCATCACCGT
	CELP domian-GFP fused protein under control of native BcCELP1 promoter	NP-SP-CELP-GFP-F:	GCTGAGAGCGGATGCTCCCACGACAGTGGAGCTCAACAAGAGGCTGGA
		NP-SP-CELP-GFP-R:	CTCCACTGTCGTGGGAGCATCCGCTCTCAGCAAGCGTGG
	CELPC234AC244A domian-GFP fused proteinunder control of native BcCELP1 promoter	NP-BcCELP1-Spel-F:	actagtGTCCCCACGAAGTCT
		CELPC234AC244A domian R:	ACTGATAGTACCATCACCGTTggcTTGTGGGACTGGGTAAGTGTCTGCAGTagcAAGAC
		CELPC234AC244A domian F:	AAgccAACGGTGATGGTACTA
		GFP-Not1 R:	gctAAGCGGCCGCTTTGTAAAG
	BcCELP1-GFP fused protein under control of BcSpl1 promoter	PtrpC-F:	GATATTGAAGGAGCATT
		pRS_3' flank R:	AGCGGATAACAATTTCACACAGGAAA
		PtrpC-Pspl1-F:	CCAAAAAATGCTCCTTCAATATCCGACAGGAATGATACT
		Pspl1-BcCELP1-R:	TGGAAAGAAGGGAGGTAATATACATTTTGAATTTGTGTGGT
		BcCrh1 F:	ATGTATATTACCTCCCT
		pRS_5' flank F:	GGTAACGCCAGGGTTTTCCCAGTCAC
	B. cinerea Bcgpdh for qRT-PCR	Bcgpdh-q F：	CGAAGAATAGCACAAACAGCTGGAC
		Bcgpdh-q R：	CGTCACCTTATGCTTCTTGCTCC
	BcCELP1 for qRT-PCR	BcCELP1-q F:	CCAACCCTTACACTACCAGAAA
		BcCELP1-q R:	CCCAGCTCAATCCTCCATAAG
		NbEF1a-q F:	TGGACACAGGGACTTCATCA
		NbEF1a-q R:	CAAGGGTGAAAGCAAGCAAT
	N. benthamiana-defense marker genes	NbACRE-31-q F:	AATTCGGCCATCGTGATCTTGGTC
		NbACRE-31-q R:	GAGAAACTGGGATTGCCTGAAGGA
		NbHIN1-q F:	CTGCAACCCATGTAGCTGTC
		NbHIN1-q R:	GGTCGAAGAACGAGCCATAG
		NbHSR203-q F:	TGCCGTCAAAGATGTAGTCG
		NbHSR203-q R:	CAGCATGGCTGACACAAAAG
		NbPAL-q F:	CCGTGTAATGCCTTGTTTCTTGA
		NbPAL-q R:	GTTATGCTCTTAGAACGTCGCCC
		NbPR1a-q F:	TGGATGCCCATAACACAGC
		NbPR1a-q R:	AATCGCCACTTCCCTCAG
		NbPti5-q F:	CCTCCAAGTTTGAGCTCGGATAGT
		NbPti5-q R:	CCAAGAAATTCTCCATGCACTCTGTC
		NbWRKY7-q F:	CACAAGGGTACAAACAACACAG
		NbWRKY7-q R:	GGTTGCATTTGGTTCATGTAAG
		NbWRKY8-q F:	AACAATGGTGCCAATAATGC
		NbWRKY8-q R:	TGCATATCCTGAGAAACCATT
	NbL04g03110.1 lignin-forming_anionic_peroxidase-like	NbL04g03110.1-q F：	GCCATGCACAACTTTCTTCC
		NbL04g03110.1-q R	CACTGCCTGTCTAACACTTGTA
	NbL19g06760.1 suberization-associated_anionic_peroxidase-like	NbL19g06760.1-q F：	CTTCTCTCATTCGTCTCCACTTC
		NbL19g06760.1-q R	CCCTATGAATGATCCGGGAATATC
	NbL01g00370.1 pathogenesis-related_protein_1-like	NbL01g00370.1-q F：	CTCCCTCATCTCAAGCTCAAA
		NbL01g00370.1-q R	GCTACCCTATTGTCCCATGTC
	NbL02g19900.1 pathogenesis-related_genes_transcriptional_activator_PTI5-like	NbL02g19900.1-q F：	CCCATCACAGGTCATAGGAAAG
		NbL02g19900.1-q R	TCAAACGTGCCTAGCCATAC
	NbL02g16160.1 thioredoxin_reductase_NTRB-like	NbL02g16160.1-q F：	ACGACGTTGACCAGTGTTAG
		NbL02g16160.1-q R	CCTGAACCAGCAGCTGTAATA
	NbL07g11160.1 putative_calcium-binding_protein_CML19	NbL07g11160.1-q F：	TGAGCTAAGAAGGTGTGTGAAG
		NbL07g11160.1-q R	TCCTCCAAACCCAACAATCC
		VIGS-NbRACK1-F:	ATTCTGTGAGTAAGGTTACCGAATTCgttcgtttcagcccgaatacactt
		VIGS-NbRACK1-R:	TCTTCGGGACATGCCCGGGCCTCGAGttcagtagctgcgcacagcc
		RT-NbRACK1-F:	TGCTAGTGGAGGCAAAGATG
		RT-NbRACK1-R:	CAGAGCGCGTGAATGATAGA
		RT-NbRBOHB-F:	CTAGCTCGGAGGAGAAACATAAC
		RT-NbRBOHB-R:	GAAAGTTTGAAGGCGAGAATCAA
		RT-NbCAT1-F:	GTTCTACACCAGAGAGGGAAAC
		RT-NbCAT1-R:	CCCTCCAATTCTCCTGGATATG
		RT-PvEF1a-F:	GGTCATTGGTCATGTCGACTCTGG
		RT-PvEF1a-R:	GCACCCAGGCATACTTGAATGACC
		RT-PvRACK1-F:	GGCGGGAAAGATGGAGTTATT
		RT-PvRACK1-R:	GCAGAGGGCATGGATAATAGAG
		RT-PvRBOHB-F:	ACATGAAGGCCATGGAAGAG
		RT-PvRBOHB-R:	GCTCCCTTGTCACCCAATAA
		RT-PvCAT1-F:	TTGGAGGAAGAGGCCATTAAG
		RT-PvCAT1-R:	TGAACAGTTTCCACTCAGGATAG
		pGBKT7-F：	CGTCGACCTGCAGCGGC
		pGBKT7-R：	GAATTCGGCCTCCATGGCCA
		pGBKT7-BcCELP1-F：	TGCATATGGCCATGGAGGCCGAATTCGCCACAATCCCTCGCAACT
		pGBKT7-BcCELP1-R：	TTATGCGGCCGCTGCAGGTCGACGttaACTGATAGTACCATCACCGTTACATTGTGG
		pGBKT7-CELP1 domain-F：	TGCATATGGCCATGGAGGCCGAATTCTCCGCTCTCAGCAAGCGT
		pGBKT7-CELP1 domain-R：	TTATGCGGCCGCTGCAGGTCGACGttaACTGATAGTACCATCACCGTTACATTGTGG
		pGBKT7-SsCELP1-F：	TGCATATGGCCATGGAGGCCGAATTCgcagttgttccccgggaaat
		pGBKT7-SsCELP1-R：	TTATGCGGCCGCTGCAGGTCGACGattgtgatatccgttaccgatgcag
		pGADT7-F：	GCTGCAGATGAATCGTAGATACT
		pGADT7-R：	CATATGAGCGTAATCTGGTACGTCG
		pGADT7-NbRACK1-F：	CGACGTACCAGATTACGCTCATATGatggcacaagaatcactagtcctcc
		pGADT7-NbRACK1-R：	TATCTACGATTCATCTGCAGCctaataacgtccaataccccaaaccct
		pGADT7-NbRACK1WD1-2-R：	TATCTACGATTCATCTGCAGCctaatcccaaagacgaagctcaccgtc
		pGADT7-NbRACK1WD1-R：	TATCTACGATTCATCTGCAGCctaagaccagacgattagggacttgtc
		pGADT7-NbCAS-F：	CGACGTACCAGATTACGCTCATATGatggcgcttagagcttcagc
		pGADT7-NbCAS-R：	TATCTACGATTCATCTGCAGCTTAtggatcagctgatgaAATagtttcaactgtaga
		NbCASCT-F：	aactATTtcatcagctgatccactctctttcagccttcgtggct
		NbCASNT-R：	tggatcagctgatgaAATagt
		pGADT7-NbCASNT-F：	CGACGTACCAGATTACGCTCATATGatggcgcttagagcttcagc
		pGADT7-NbCASNT-R：	TATCTACGATTCATCTGCAGCTTAtggatcagctgatgaAATagtttcaactgtaga
		pGADT7-NbRBOHB-F：	CGACGTACCAGATTACGCTCATATGatgcaaaattctgaaaatcatcatccgc
		pGADT7-NbRBOHB-R：	TATCTACGATTCATCTGCAGCctaaaaattttctttatggaaatcaaacttggtggagg
		pGADT7-NbJIM2-F：	CGACGTACCAGATTACGCTCATATGatggattgcataaagaagatgtggtcag
		pGADT7-NbJIM2-R：	TATCTACGATTCATCTGCAGCttactcaaattgcaggatctttcttgcaatct
		pGADT7-NbMIR-F：	CGACGTACCAGATTACGCTCATATGgccgaagctcctccagc
		pGADT7-NbMIR-R：	TATCTACGATTCATCTGCAGCttaagccttcttaaacataaccttaaatgggaca
		pGADT7-NbSGT-F：	CGACGTACCAGATTACGCTCATATGatggcgtccgatctggaga
		pGADT7-NbSGT-R：	TATCTACGATTCATCTGCAGCctagatttcccatttcttcagctccat
		pGADT7-NbBLP4-F：	CGACGTACCAGATTACGCTCATATGttttctatagccacagaagaagctaccaagt
		pGADT7-NbBLP4-R：	TATCTACGATTCATCTGCAGCctacagctcgtcatgatcatcatcct
		pGADT7-NbMIP1.2-F：	CGACGTACCAGATTACGCTCATATGatgtttgggagagcaccaaagaag
		pGADT7-NbMIP1.2-R：	TATCTACGATTCATCTGCAGCttactgttgtgcacattcaactctctgt
		pGADT7-NbCAT1-F：	CGACGTACCAGATTACGCTCATATGatggatccatacaagtatcgtccgt
		pGADT7-NbCAT1-R：	TATCTACGATTCATCTGCAGCtcatatgcttggtctcacattaagcctagaag
