# Supplementary material for: A secreted Botrytis cinerea stage-specific effector promotes virulence by targeting the plant ROS-generating machinery
Source: Research Square preprint supplement (doi:10.21203/rs.3.rs-4918366/v1), 2024-08-28
Supplement: Supplementary file 2 [file 879757e248d7fba0eff48240.xlsx]

## Sheet: Sheet1
Strain	Genotype and description	Source
B05.10	Haploidized B. cinerea wild type strain
Dbccelp1	bccelp1 deletion mutant	This work
Com-bccelp1	BcCELP1-GFP fused protein under control of the native bccelp1 promoter	This work
Com-CELP domain	CELP domain-GFP fused protein under control of the native bccelp1 promoter	This work
Com-CELPC234AC244A domain	CELPC234AC244A domain-GFP fused protein under control of the native bccelp1 promoter	This work
Com-Probcspl1-bcelp1	BcCELP1-GFP fused protein under control of the bcspl1 promoter	This work
OE-bccelp1	Over expression strain of bccelp1 under control of the H2B constitutive promoter	This work
