# Supplementary material for: A secreted Botrytis cinerea stage-specific effector promotes virulence by targeting the plant ROS-generating machinery
Source: Research Square preprint supplement (doi:10.21203/rs.3.rs-4918366/v1), 2024-08-28
Supplement: Supplementary file 3 [file d4bf8542cb1379985c82da08.xlsx]

## Sheet: protein
Protein IDs	Fasta headers	Number of proteins	Peptides	Unique peptides	Sequence coverage [%]	Unique sequence coverage [%]	Mol. weight [kDa]	Sequence length	Sequence lengths	Q-value	Score	Intensity
BK;W6KDG8	sp|BK|;tr|W6KDG8|W6KDG8_NICBE Green fluorescent protein OS=Nicotiana benthamiana OX=4100 GN=gfp PE=1 SV=1	2	18	18	74.9	74.9	26.941	239	239;238	0	323.31	34794000000
B8R518;B8R519;Q5EC25;Q5I6U1	tr|B8R518|B8R518_NICBE Ubiquitin (Fragment) OS=Nicotiana benthamiana OX=4100 PE=2 SV=1;tr|B8R519|B8R519_NICBE Ubiquitin (Fragment) OS=Nicotiana benthamiana OX=4100 PE=2 SV=1;tr|Q5EC25|Q5EC25_NICBE Ubiquitin extension protein 1 OS=Nicotiana benthamiana OX=4	4	4	4	47.7	47.7	7.3232	65	65;67;156;156	0	323.31	1795200000
A0A0A8IBT8	tr|A0A0A8IBT8|A0A0A8IBT8_NICBE Glyceraldehyde-3-phosphate dehydrogenase OS=Nicotiana benthamiana OX=4100 GN=NbGAPDH-A PE=2 SV=1	1	15	15	37.9	37.9	42.686	401	401	0	323.31	1788600000
A0A1W5XFS7;C9DFB9;D4P5A4;Q769C6	tr|A0A1W5XFS7|A0A1W5XFS7_NICBE HSP70 OS=Nicotiana benthamiana OX=4100 GN=HSP70 PE=2 SV=1	4	19	12	29.9	20.5	71.134	649	649;181;138;137	0	323.31	946980000
E5LLE7	tr|E5LLE7|E5LLE7_NICBE Phosphoglycerate kinase OS=Nicotiana benthamiana OX=4100 PE=2 SV=1	1	15	15	39.1	39.1	50.083	481	481	0	323.31	771550000
H9C954	tr|H9C954|H9C954_NICBE Actin (Fragment) OS=Nicotiana benthamiana OX=4100 GN=act PE=2 SV=1	1	8	8	27.9	27.9	37.53	341	341	0	263.11	726880000
K0IBB4;C6FFS2	tr|K0IBB4|K0IBB4_NICBE Catalase (Fragment) OS=Nicotiana benthamiana OX=4100 PE=2 SV=1;tr|C6FFS2|C6FFS2_NICBE Catalase OS=Nicotiana benthamiana OX=4100 GN=CAT1 PE=2 SV=1	2	15	15	30.3	30.3	56.702	491	491;492	0	256.42	699310000
Q6UJX5;A0A0M4J345;D0EJY9;A0A0M3SBS3;A0A224ATS2;A0A0M4J3A8;Q6UJX6	tr|Q6UJX5|Q6UJX5_NICBE Molecular chaperone Hsp90-2 OS=Nicotiana benthamiana OX=4100 PE=2 SV=1;tr|A0A0M4J345|A0A0M4J345_NICBE Heat shock protein 90-2 OS=Nicotiana benthamiana OX=4100 PE=2 SV=1;tr|D0EJY9|D0EJY9_NICBE Molecular chaperone Hsp90-3 (Fragment) OS	7	13	13	18.2	18.2	80.137	699	699;699;700;700;699;699;699	0	247.29	143530000
A0A481NUV9	tr|A0A481NUV9|A0A481NUV9_NICBE ferredoxin--NADP(+) reductase (Fragment) OS=Nicotiana benthamiana OX=4100 PE=2 SV=1	1	9	9	24.9	24.9	40.348	362	362	0	119.59	795010000
A0A0F7JIC2;A0A0F7JJ49;A0A0F7JLU6;H9C955	tr|A0A0F7JIC2|A0A0F7JIC2_NICBE Glyceraldehyde-3-phosphate dehydrogenase OS=Nicotiana benthamiana OX=4100 GN=GAPC2 PE=2 SV=1;tr|A0A0F7JJ49|A0A0F7JJ49_NICBE Glyceraldehyde-3-phosphate dehydrogenase OS=Nicotiana benthamiana OX=4100 GN=GAPC3 PE=2 SV=1;tr|A0A0F	4	8	8	22.8	22.8	36.725	337	337;337;340;147	0	113.35	574590000
A0A0S4IJL0	sp|A0A0S4IJL0|RBS_NICBE Ribulose bisphosphate carboxylase small subunit, chloroplastic OS=Nicotiana benthamiana OX=4100 GN=rbcS PE=1 SV=1	1	5	4	22.2	17.8	20.342	180	180	0	90.262	2192300000
Q8SAQ3	tr|Q8SAQ3|Q8SAQ3_NICBE Ribulose bisphosphate carboxylase small subunit (Fragment) OS=Nicotiana benthamiana OX=4100 PE=2 SV=1	1	3	2	24.8	17.7	13.365	113	113	0	81.397	7800700
A0A6H0CCF4	tr|A0A6H0CCF4|A0A6H0CCF4_NICBE ATP synthase subunit alpha OS=Nicotiana benthamiana OX=4100 PE=2 SV=1	1	10	10	19.3	19.3	55.225	509	509	0	81.326	580550000
B7U9Z3	tr|B7U9Z3|B7U9Z3_NICBE ER luminal-binding protein OS=Nicotiana benthamiana OX=4100 GN=BLP4 PE=2 SV=1	1	17	14	24	20.1	73.487	667	667	0	61.676	292390000
A0A0S0N5Y9	tr|A0A0S0N5Y9|A0A0S0N5Y9_NICBE Tubulin alpha chain OS=Nicotiana benthamiana OX=4100 GN=TUA6 PE=2 SV=1	1	4	4	13.1	13.1	49.767	451	451	0	59.193	65584000
A0A286RNF7;A4D0J9;A4D0K0	tr|A0A286RNF7|A0A286RNF7_NICBE Carbonic anhydrase OS=Nicotiana benthamiana OX=4100 PE=2 SV=1	3	8	8	23.1	23.1	34.522	321	321;177;178	0	31.96	527810000
A0A088F9I1;A0A088FCE7;A0A088F8F4;A0A088F8L1	tr|A0A088F9I1|A0A088F9I1_NICBE Chloroplast ATP-dependent Clp protease chaperone protein OS=Nicotiana benthamiana OX=4100 GN=ClpC1A PE=2 SV=1;tr|A0A088FCE7|A0A088FCE7_NICBE Chloroplast ATP-dependent Clp protease chaperone protein OS=Nicotiana benthamiana OX	4	5	5	6.5	6.5	100.68	906	906;908;923;938	0	22.152	32264000
Q6XX19	tr|Q6XX19|Q6XX19_NICBE Translation elongation factor 1 alpha (Fragment) OS=Nicotiana benthamiana OX=4100 PE=2 SV=1	1	6	6	21.4	21.4	24.28	220	220	0	20.507	614480000
Q5EFR5;I0B7K0;I0B7J9	tr|Q5EFR5|Q5EFR5_NICBE Chloroplast oxygen-evolving protein 16 kDa subunit OS=Nicotiana benthamiana OX=4100 GN=psbQ PE=2 SV=1;tr|I0B7K0|I0B7K0_NICBE Chloroplast PsbQ2 OS=Nicotiana benthamiana OX=4100 GN=psbQ2 PE=2 SV=1;tr|I0B7J9|I0B7J9_NICBE Chloroplast Psb	3	4	4	21.5	21.5	24.195	228	228;228;228	0	18.651	84064000
F2VJF4;C9DFA9	tr|F2VJF4|F2VJF4_NICBE Miraculin-like protein OS=Nicotiana benthamiana OX=4100 GN=Mir3 PE=2 SV=1;tr|C9DFA9|C9DFA9_NICBE Endopeptidase inhibitor (Fragment) OS=Nicotiana benthamiana OX=4100 GN=Mir PE=2 SV=1	2	5	5	21.5	21.5	22.729	205	205;102	0	13.398	64126000
A0A387K3P5;A0A387K371;A0A387K109	tr|A0A387K3P5|A0A387K3P5_NICBE GTP-binding nuclear protein OS=Nicotiana benthamiana OX=4100 GN=NbRan1a PE=2 SV=1;tr|A0A387K371|A0A387K371_NICBE GTP-binding nuclear protein OS=Nicotiana benthamiana OX=4100 GN=NbRan2 PE=2 SV=1;tr|A0A387K109|A0A387K109_NICBE	3	4	4	19.5	19.5	25.018	221	221;221;219	0	12.544	38041000
A0A0A7HI84	tr|A0A0A7HI84|A0A0A7HI84_NICBE Histone H4 OS=Nicotiana benthamiana OX=4100 PE=2 SV=1	1	7	7	58.3	58.3	11.409	103	103	0	12.165	162180000
U5PY93;U5Q1Q7;U5PY20;A0A8A1L3A8;U5HUF9	tr|U5PY93|U5PY93_NICBE MIP1.2 OS=Nicotiana benthamiana OX=4100 PE=2 SV=1;tr|U5Q1Q7|U5Q1Q7_NICBE MIP1.1b OS=Nicotiana benthamiana OX=4100 PE=2 SV=1;tr|U5PY20|U5PY20_NICBE MIP1.3 OS=Nicotiana benthamiana OX=4100 PE=2 SV=1;tr|A0A8A1L3A8|A0A8A1L3A8_NICBE MIP1.	5	4	2	11	6	46.784	419	419;418;418;419;420	0	11.53	16593000
A0A0A8K9V3	tr|A0A0A8K9V3|A0A0A8K9V3_NICBE geranylgeranyl diphosphate reductase OS=Nicotiana benthamiana OX=4100 GN=chlP PE=2 SV=1	1	3	3	8.6	8.6	51.324	464	464	0	8.926	29505000
E1AXT8	tr|E1AXT8|E1AXT8_NICBE (S)-2-hydroxy-acid oxidase OS=Nicotiana benthamiana OX=4100 GN=GOX PE=1 SV=1	1	6	6	15.9	15.9	40.596	371	371	0	8.8876	48859000
Q58H58;I0B7J2;I0B7J1;I0B7J4	tr|Q58H58|Q58H58_NICBE Chloroplast photosynthetic oxygen-evolving protein 33 kDa subunit OS=Nicotiana benthamiana OX=4100 GN=psbO PE=2 SV=1;tr|I0B7J2|I0B7J2_NICBE Chloroplast PsbO2 OS=Nicotiana benthamiana OX=4100 GN=psbO2 PE=2 SV=1;tr|I0B7J1|I0B7J1_NICBE	4	2	2	8.1	8.1	35.167	332	332;332;332;333	0	8.3788	3782300
R9W4N2	tr|R9W4N2|R9W4N2_NICBE thioredoxin-dependent peroxiredoxin (Fragment) OS=Nicotiana benthamiana OX=4100 PE=2 SV=1	1	2	2	13.4	13.4	25.502	231	231	0	8.262	23652000
A2IBL2;A0A219V415	tr|A2IBL2|A2IBL2_NICBE Histone H2B OS=Nicotiana benthamiana OX=4100 GN=H2b PE=2 SV=1;tr|A0A219V415|A0A219V415_NICBE Histone H2B OS=Nicotiana benthamiana OX=4100 PE=2 SV=1	2	4	4	25.2	25.2	15.858	147	147;147	0	8.0109	323230000
Q8H1A1	tr|Q8H1A1|Q8H1A1_NICBE Actin (Fragment) OS=Nicotiana benthamiana OX=4100 GN=actin PE=3 SV=1	1	1	1	7.3	7.3	15.333	137	137	0	7.7873	88894000
A0A0H5BGR5	tr|A0A0H5BGR5|A0A0H5BGR5_NICBE Acetoacetyl-coenzyme A thiolase OS=Nicotiana benthamiana OX=4100 GN=NbACAT1a PE=2 SV=1	1	1	1	3.2	3.2	41.296	404	404	0	7.5051	0
Q5TIM6	tr|Q5TIM6|Q5TIM6_NICBE Putative glycosyltransferase OS=Nicotiana benthamiana OX=4100 GN=x34.2 PE=2 SV=1	1	1	1	1.3	1.3	51.173	450	450	0	6.9144	0
Q2LAH1;Q2LAH0	tr|Q2LAH1|Q2LAH1_NICBE Chloroplast photosystem II 22 kDa component OS=Nicotiana benthamiana OX=4100 GN=psbS2 PE=4 SV=1;tr|Q2LAH0|Q2LAH0_NICBE Chloroplast photosystem II 22 kDa component OS=Nicotiana benthamiana OX=4100 GN=psbS1 PE=2 SV=1	2	1	1	5.8	5.8	29.014	274	274;277	0	6.8903	12712000
F2Z9R2;F2Z9R3;F2Z9R1	tr|F2Z9R2|F2Z9R2_NICBE Glucose-6-phosphate 1-dehydrogenase OS=Nicotiana benthamiana OX=4100 GN=NbG6PDH-P1 PE=2 SV=1	3	6	6	15	15	66.951	588	588;593;511	0	5.0962	54312000
Q84V57	tr|Q84V57|Q84V57_NICBE Pectinesterase OS=Nicotiana benthamiana OX=4100 PE=2 SV=1	1	3	3	6.4	6.4	63.405	579	579	0	4.9987	36373000
H9A0F9;A0A173FEI6;A0A0P0INT0	tr|H9A0F9|H9A0F9_NICBE ATP-dependent RNA helicase OS=Nicotiana benthamiana OX=4100 PE=3 SV=1;tr|A0A173FEI6|A0A173FEI6_NICBE ATP-dependent RNA helicase OS=Nicotiana benthamiana OX=4100 GN=IF4a PE=2 SV=1;tr|A0A0P0INT0|A0A0P0INT0_NICBE ATP-dependent RNA helic	3	4	4	10.7	10.7	46.943	413	413;413;413	0	4.5472	46598000
I3QHX5;A0A0F7R5Z5;B6EBE6	tr|I3QHX5|I3QHX5_NICBE Adenosylhomocysteinase OS=Nicotiana benthamiana OX=4100 PE=2 SV=1;tr|A0A0F7R5Z5|A0A0F7R5Z5_NICBE Adenosylhomocysteinase OS=Nicotiana benthamiana OX=4100 GN=NbSAHH1a PE=2 SV=1;tr|B6EBE6|B6EBE6_NICBE Adenosylhomocysteinase (Fragment) O	3	2	2	4.3	4.3	53.118	485	485;485;212	0	4.1322	12209000
A0A248QJL3;A0A248QFH8;A0A248QEL2;A0A0F7R532;A0A1X9RIL3	tr|A0A248QJL3|A0A248QJL3_NICBE S-adenosylmethionine synthase OS=Nicotiana benthamiana OX=4100 GN=SAMs PE=2 SV=1;tr|A0A248QFH8|A0A248QFH8_NICBE S-adenosylmethionine synthase OS=Nicotiana benthamiana OX=4100 GN=SAMs PE=2 SV=1;tr|A0A248QEL2|A0A248QEL2_NICBE S	5	2	2	5.6	5.6	42.479	390	390;390;390;390;393	0	4.0217	53724000
Q58H59;I0B7J5;A0A4D6IA34;I0B7J6	tr|Q58H59|Q58H59_NICBE 23 kDa subunit of oxygen evolving system of photosystem II (Fragment) OS=Nicotiana benthamiana OX=4100 GN=psbP PE=2 SV=1;tr|I0B7J5|I0B7J5_NICBE 23 kDa subunit of oxygen evolving system of photosystem II OS=Nicotiana benthamiana OX=41	4	2	2	8.4	8.4	28.317	261	261;265;265;265	0	3.4509	5116700
K7ZLE1	tr|K7ZLE1|K7ZLE1_NICBE Calcium-sensing receptor OS=Nicotiana benthamiana OX=4100 GN=NbCAS PE=2 SV=1	1	2	2	5.6	5.6	41.869	394	394	0	2.9273	5838500
I1Y996;C9DFA5	tr|I1Y996|I1Y996_NICBE RabE1 OS=Nicotiana benthamiana OX=4100 PE=2 SV=1;tr|C9DFA5|C9DFA5_NICBE Ras-related GTP-binding protein (Fragment) OS=Nicotiana benthamiana OX=4100 GN=Ras PE=2 SV=1	2	2	2	10.2	10.2	23.76	216	216;131	0	2.7365	86752000
J7EUE8	tr|J7EUE8|J7EUE8_NICBE Germin-like protein OS=Nicotiana benthamiana OX=4100 PE=2 SV=1	1	2	2	13.1	13.1	23.456	221	221	0	2.618	61335000
Q84UV6;A0A0K0PU31;A0A0K0PTC5	tr|Q84UV6|Q84UV6_NICBE SKP1-like protein OS=Nicotiana benthamiana OX=4100 GN=SKP1.3 PE=2 SV=1;tr|A0A0K0PU31|A0A0K0PU31_NICBE SKP1-like protein OS=Nicotiana benthamiana OX=4100 GN=SKP1.1 PE=2 SV=1;tr|A0A0K0PTC5|A0A0K0PTC5_NICBE SKP1-like protein OS=Nicotian	3	1	1	3.9	3.9	17.449	153	153;155;156	0	2.5602	0
E0X585	tr|E0X585|E0X585_NICBE glycine dehydrogenase (aminomethyl-transferring) OS=Nicotiana benthamiana OX=4100 GN=GDCP1 PE=2 SV=1	1	2	2	6.3	6.3	37.263	350	350	0	2.5516	10580000
Q5EEQ1	tr|Q5EEQ1|Q5EEQ1_NICBE Photosystem I reaction center subunit X PSI-K OS=Nicotiana benthamiana OX=4100 PE=2 SV=1	1	2	2	7.7	7.7	13.402	130	130	0	2.5163	76364000
A0A224AKY6;Q5EEY5;Q8LKF9;Q84UV7	tr|A0A224AKY6|A0A224AKY6_NICBE Suppressor of G2 allele of SKP1 OS=Nicotiana benthamiana OX=4100 GN=SGT1 PE=2 SV=1;tr|Q5EEY5|Q5EEY5_NICBE SGT1 OS=Nicotiana benthamiana OX=4100 GN=SGT1 PE=2 SV=1;tr|Q8LKF9|Q8LKF9_NICBE SGT1-like protein (Fragment) OS=Nicotian	4	2	2	10.6	10.6	38.957	348	348;370;211;370	0	2.1674	126660000
A0A455QYV0;C5MTW1	tr|A0A455QYV0|A0A455QYV0_NICBE Receptor for activated C kinase 1 OS=Nicotiana benthamiana OX=4100 GN=NbRACK1 PE=2 SV=1;tr|C5MTW1|C5MTW1_NICBE Heterotrimeric G protein beta 1 subunit OS=Nicotiana benthamiana OX=4100 PE=2 SV=1	2	2	2	6.1	6.1	35.99	328	328;326	0	2.1279	6092700
A0A0H5BGR8;A0A0H5AWB5;A0A0H5AZC4;A0A0H5AWE5;A0A0H5B1M6;A0A0H5AWF7	tr|A0A0H5BGR8|A0A0H5BGR8_NICBE PDR-type ACB transporter OS=Nicotiana benthamiana OX=4100 GN=NbPDR2b PE=2 SV=1;tr|A0A0H5AWB5|A0A0H5AWB5_NICBE PDR-type ACB transporter OS=Nicotiana benthamiana OX=4100 GN=NbPDR2a PE=2 SV=1;tr|A0A0H5AZC4|A0A0H5AZC4_NICBE PDR-t	6	3	2	2.3	1.6	161.77	1433	1433;1436;1425;1434;1435;1421	0	2.0896	7992200
U5Q1N6;U5PYM4	tr|U5Q1N6|U5Q1N6_NICBE MIP1.4b OS=Nicotiana benthamiana OX=4100 PE=2 SV=1;tr|U5PYM4|U5PYM4_NICBE MIP1.4a OS=Nicotiana benthamiana OX=4100 PE=2 SV=1	2	4	2	11.2	6.2	46.658	418	418;403	0	2.0239	9377300
D2DWL6	tr|D2DWL6|D2DWL6_NICBE QM OS=Nicotiana benthamiana OX=4100 PE=2 SV=1	1	2	2	10.4	10.4	24.946	221	221	0	1.9656	19389000
Q6L9F6	tr|Q6L9F6|Q6L9F6_NICBE Heat shock protein 70 (Fragment) OS=Nicotiana benthamiana OX=4100 GN=Hsp70 PE=2 SV=1	1	3	1	6	2.9	42.855	383	383	0	1.8912	5272100
V5KY72	tr|V5KY72|V5KY72_NICBE Ubiquitin-conjugating enzyme variant OS=Nicotiana benthamiana OX=4100 GN=Suv PE=2 SV=1	1	1	1	6.1	6.1	18.46	164	164	0	1.8863	23123000
Q2LFC3;Q2LFC4;A0A0H3W5K5;A0A7M1C899;A0A515KZ11;A0A0H3W562;A0A7M4BIM2;A0A515KYM7	tr|Q2LFC3|Q2LFC3_NICBE AGO1-2 (Fragment) OS=Nicotiana benthamiana OX=4100 PE=2 SV=1;tr|Q2LFC4|Q2LFC4_NICBE AGO1-1 (Fragment) OS=Nicotiana benthamiana OX=4100 PE=2 SV=1;tr|A0A0H3W5K5|A0A0H3W5K5_NICBE Argonaute 1L (Fragment) OS=Nicotiana benthamiana OX=4100	8	2	2	2.3	2.3	109.03	979	979;1052;1052;1058;1058;1058;1110;1110	0	1.6533	13322000
A0A173DW85	tr|A0A173DW85|A0A173DW85_NICBE phosphatidylinositol 3-kinase OS=Nicotiana benthamiana OX=4100 GN=PI3K PE=2 SV=1	1	1	1	1.3	1.3	90.525	790	790	0	1.4766	0
H9A0G0	tr|H9A0G0|H9A0G0_NICBE Ribosomal protein L6 alpha-beta domain-containing protein (Fragment) OS=Nicotiana benthamiana OX=4100 PE=3 SV=1	1	1	1	8.4	8.4	13.465	119	119	0	1.2744	7674300
X4YFK1	tr|X4YFK1|X4YFK1_NICBE Suppressor of gene silencing 3 OS=Nicotiana benthamiana OX=4100 GN=SGS3 PE=2 SV=1	1	1	1	6.5	6.5	72.691	635	635	0	1.1985	2620800
A0A1V1H612;Q84KK7	tr|A0A1V1H612|A0A1V1H612_NICBE Respiratory burst oxidase homolog protein B OS=Nicotiana benthamiana OX=4100 GN=NbRBOHB PE=2 SV=1;tr|Q84KK7|Q84KK7_NICBE Respiratory burst oxidase homolog OS=Nicotiana benthamiana OX=4100 GN=NbrbohB PE=2 SV=1	2	1	1	1.9	1.9	105.91	938	938;939	0	1.1466	8952200
A0A385HBR6	tr|A0A385HBR6|A0A385HBR6_NICBE Receptor-like cytoplasmic kinase OS=Nicotiana benthamiana OX=4100 GN=JIM2 PE=2 SV=1	1	1	1	5.8	5.8	39.173	345	345	0	1.0617	10875000

## Sheet: Peptides
Sequence	Length	Missed cleavages	Mass	Proteins	Leading razor protein	Start position	End position	Unique (Groups)	Unique (Proteins)	Charges	PEP	Score	Intensity
AAALNIVPTSTGAAK	15	0	1383.77	A0A0A8IBT8	A0A0A8IBT8	266	280	yes	yes	2;3	2.2633e-18	146.16	496760000
AAELTSLLESR	11	0	1188.63	A0A6H0CCF4	A0A6H0CCF4	7	17	yes	yes	2	1.8212e-05	90.108	15193000
AASFNIIPSSTGAAK	15	0	1433.75	A0A0F7JIC2;A0A0F7JJ49;A0A0F7JLU6;H9C955	A0A0F7JIC2	203	217	yes	no	2	5.247e-23	127.78	103900000
AAVPTIK	7	0	698.433	E5LLE7	E5LLE7	118	124	yes	yes	2	0.023303	83.614	81956000
ADLNVPLDDNQNITDDTR	18	0	2027.94	E5LLE7	E5LLE7	98	115	yes	yes	2;3	6.9068e-13	76.262	26952000
ADLVNNLGTIAR	12	0	1255.69	Q6UJX5;A0A0M4J345;D0EJY9;A0A0M3SBS3;A0A224ATS2;A0A0M4J3A8;Q6UJX6	Q6UJX5	88	99	yes	no	2	1.717e-18	112.36	25060000
AEVKFEGDTLVNR	13	1	1476.76	BK;W6KDG8	BK	111	123	yes	no	2;3	0	252.97	1655300000
AEVKFEGDTLVNRIELK	17	2	1960.06	BK;W6KDG8	BK	111	127	yes	no	4	0.019073	13.904	3323900
AGFAGDDAPR	10	0	975.441	H9C954	H9C954	9	18	yes	yes	2	1.8107e-08	122.19	225900000
AGFIHFK	7	0	818.444	A0A286RNF7	A0A286RNF7	119	125	yes	yes	1	0.019055	61.997	21591000
AIALTVDTPR	10	0	1055.6	E1AXT8	E1AXT8	152	161	yes	yes	2	0.0046788	111.95	10983000
AIDLIDEAGSR	11	0	1158.59	A0A088F9I1;A0A088FCE7;A0A088F8F4;A0A088F8L1	A0A088F9I1	466	476	yes	no	2	0.0025763	72.607	14959000
AKEGCRVSNR	10	2	1175.58	F2Z9R2	F2Z9R2	201	210	yes	yes	1	0.023929	0	21472000
APGVQTPVIVR	11	0	1135.67	K0IBB4;C6FFS2	K0IBB4	91	101	yes	no	2	3.2156e-06	98.033	166100000
ARFEELNMDLFR	12	1	1539.75	A0A1W5XFS7;Q6L9F6	A0A1W5XFS7	306	317	no	no	3	0.0079682	51.211	7139600
ARFEELNNDLFR	12	1	1522.75	B7U9Z3	B7U9Z3	333	344	yes	yes	3	0.0033295	44.511	10853000
ATAGDTHLGGEDFDNR	16	0	1674.72	A0A1W5XFS7	A0A1W5XFS7	227	242	yes	yes	2;3	1.0822e-152	172.09	81873000
AVALVLPSLK	10	0	1009.65	A0A0A8IBT8	A0A0A8IBT8	281	290	yes	yes	2	0.0013131	88.819	456430000
AVDSLVPIGR	10	0	1025.59	A0A6H0CCF4	A0A6H0CCF4	154	163	yes	yes	2	1.0436e-24	141.39	198660000
AVENSPFLEK	10	0	1132.58	Q6UJX5;A0A0M4J345;D0EJY9;A0A0M3SBS3;A0A224ATS2;A0A0M4J3A8;Q6UJX6	Q6UJX5	472	481	yes	no	2	0.020499	54.416	9472300
AVFPSIVGRPR	11	1	1197.7	H9C954	H9C954	19	29	yes	yes	2;3	7.539e-79	157.91	122040000
AVFVDLEPTVIDEVR	15	0	1700.9	A0A0S0N5Y9	A0A0S0N5Y9	65	79	yes	yes	2	2.0219e-06	63.408	8930200
AWPYVQNDLR	10	0	1260.63	Q5EFR5;I0B7K0;I0B7J9	Q5EFR5	149	158	yes	no	2	0.013737	58.23	9867000
AYPQAWIR	8	0	1003.52	A0A0S4IJL0	A0A0S4IJL0	150	157	yes	yes	2	0.00091249	72.355	37067000
AYPQAWVR	8	0	989.508	Q8SAQ3	Q8SAQ3	52	59	yes	yes	2	6.9208e-74	103.28	0
DAGVIAGLNVAR	12	0	1154.64	B7U9Z3	B7U9Z3	194	205	yes	yes	2	0.001348	68.846	20884000
DAGVIAGLNVLR	12	0	1196.69	A0A1W5XFS7;C9DFB9;D4P5A4	A0A1W5XFS7	164	175	yes	no	2	2.8375e-11	151.44	56468000
DAVTYTEHAR	10	0	1161.54	A0A0A7HI84	A0A0A7HI84	69	78	yes	yes	2	3.0367e-05	118.5	13586000
DAVVTVPAYFNDAQR	15	0	1664.82	B7U9Z3	B7U9Z3	175	189	yes	yes	2	1.8484e-06	74.76	20961000
DAYVGDEAQSK	11	0	1181.52	H9C954	H9C954	41	51	yes	yes	2	8.3741e-141	114.97	0
DEEIDYFPSR	10	0	1269.55	K0IBB4;C6FFS2	K0IBB4	386	395	yes	no	2	1.6896e-20	107.57	21195000
DGIVWADYKK	10	1	1193.61	A0A481NUV9	A0A481NUV9	340	349	yes	yes	2;3	0.0010311	78.06	71179000
DGKPYIQVK	9	1	1046.58	B7U9Z3	B7U9Z3	131	139	yes	yes	2	0.021202	61.679	11205000
DLESSSELTR	10	0	1135.54	F2Z9R2	F2Z9R2	250	259	yes	yes	2	0.0041571	44.377	0
DNIQGITKPAIR	12	1	1324.75	A0A0A7HI84	A0A0A7HI84	25	36	yes	yes	2;3	7.0342e-05	80.763	45169000
DNNLLGK	7	0	772.408	A0A1W5XFS7	A0A1W5XFS7	458	464	yes	yes	2	4.8811e-06	100.07	43066000
DNTFVYMCGLK	11	0	1346.6	A0A481NUV9	A0A481NUV9	313	323	yes	yes	2	1.6868e-05	87.308	55902000
DSPLDVIAINDTGGVK	16	0	1612.83	A0A0A8IBT8	A0A0A8IBT8	90	105	yes	yes	2	2.3828e-15	118.77	28008000
DTSGENLGR	9	0	947.431	Q6UJX5;A0A0M4J345;D0EJY9;A0A0M3SBS3;A0A224ATS2;A0A0M4J3A8	Q6UJX5	162	170	yes	no	2	4.9302e-90	104.37	0
DVNAAVATIK	10	0	1000.56	A0A0S0N5Y9	A0A0S0N5Y9	327	336	yes	yes	2	0.0053851	61.78	24723000
DYFDGKEPNK	10	1	1211.55	B7U9Z3	B7U9Z3	385	394	yes	yes	2;3	0.019432	64.654	27709000
EAEEFAEEDK	10	0	1195.49	B7U9Z3	B7U9Z3	554	563	yes	yes	2	0.0097797	59.931	4556600
EDGNILGHK	9	0	981.488	BK;W6KDG8	BK	133	141	yes	no	1;2	0.001406	117.39	804370000
EDQLEYLEER	10	0	1322.6	Q6UJX5;A0A0M4J345;D0EJY9;A0A0M3SBS3;A0A224ATS2;A0A0M4J3A8;Q6UJX6	Q6UJX5	180	189	yes	no	2	0.0031134	66.435	5313800
EEQDDYAVQSFER	13	0	1614.68	A0A0H5BGR5	A0A0H5BGR5	183	195	yes	yes	2	2.2505e-09	56.094	0
EGIPPDQQR	9	0	1038.51	B8R518;B8R519;Q5EC25	B8R518	22	30	yes	no	2	0.013752	91.783	41336000
EHHSSPGYYDGR	12	0	1403.59	Q8SAQ3	Q8SAQ3	13	24	yes	yes	3	3.0011e-11	103.43	7800700
EIQTAVR	7	0	815.45	A2IBL2;A0A219V415	A2IBL2	116	122	yes	no	2	3.5411e-05	128.75	179210000
EITALAPSSMK	11	0	1146.6	H9C954	H9C954	306	316	yes	yes	2	9.9181e-06	86.882	34269000
EIYDQYGEDALK	12	0	1442.66	U5PY93;U5Q1Q7;U5PY20;A0A8A1L3A8;U5HUF9;U5Q1N6;U5PYM4	U5PY93	68	79	no	no	2	0.0053021	51.436	12124000
ELAQAYEVLSDSQK	14	0	1579.77	U5Q1N6	U5Q1N6	53	66	yes	yes	3	0.010122	18.096	0
ELAQQIEK	8	0	957.513	H9A0F9;A0A173FEI6;A0A0P0INT0	H9A0F9	119	126	yes	no	2	0.0080322	99.375	11580000
ELDYLVGAVSNPK	13	0	1403.73	E5LLE7	E5LLE7	253	265	yes	yes	1;2	3.5448e-41	169.65	78329000
ELESICNPIIAK	12	0	1385.72	A0A1W5XFS7;Q769C4	A0A1W5XFS7	604	615	no	no	2	0.0032321	54.982	7718200
ELIIGDR	7	0	814.455	A0A6H0CCF4	A0A6H0CCF4	167	173	yes	yes	2	1.5799e-32	146.94	198020000
ELISNSSDALDK	12	0	1290.63	Q6UJX5;A0A0M4J345;D0EJY9;A0A0M3SBS3;A0A224ATS2;A0A0M4J3A8;Q6UJX6	Q6UJX5	34	45	yes	no	2	9.8407e-06	83.499	14854000
ELISNSSDALDKIR	14	1	1559.82	Q6UJX5;A0A0M4J345;D0EJY9;A0A0M3SBS3;A0A224ATS2;A0A0M4J3A8;Q6UJX6	Q6UJX5	34	47	yes	no	2;3	5.7093e-10	90.759	14572000
ENVSSEALEAAR	12	0	1274.61	D2DWL6	D2DWL6	58	69	yes	yes	2	0.0067836	72.434	10085000
ESTLHLVLR	9	0	1066.61	B8R518;B8R519;Q5EC25;Q5I6U1	B8R518	52	60	yes	no	2;3	5.3175e-173	186.13	904160000
ETISNWFK	8	0	1023.5	F2VJF4;C9DFA9	F2VJF4	146	153	yes	no	2	0.0175	76.035	7989900
EVEYPGQVLR	10	0	1188.61	Q58H59;I0B7J5;A0A4D6IA34;I0B7J6	Q58H59	114	123	yes	no	2	0.0033904	62.464	0
EVSNEWSLVNK	11	0	1303.64	Q6UJX5;A0A0M4J345;D0EJY9;A0A0M3SBS3;A0A224ATS2;A0A0M4J3A8	Q6UJX5	253	263	yes	no	2	0.011017	71.614	4684200
EVSSYLK	7	0	824.428	Q6XX19	Q6XX19	109	115	yes	yes	2	0.021568	83.377	89764000
EVSSYLKK	8	1	952.523	Q6XX19	Q6XX19	109	116	yes	yes	2	0.0028137	74.255	30621000
FADASVQSDIK	11	0	1179.58	A0A1W5XFS7;C9DFB9;D4P5A4	A0A1W5XFS7	81	91	yes	no	2	0.0021398	58.592	18927000
FAVGTEAIAK	10	0	1005.55	E5LLE7	E5LLE7	406	415	yes	yes	2	0.0018318	79.059	17689000
FDLTGIAPAPR	11	0	1156.62	B7U9Z3	B7U9Z3	492	502	yes	yes	2	0.008661	53.751	50305000
FEELNMDLFR	10	0	1312.61	A0A1W5XFS7;Q6L9F6	A0A1W5XFS7	308	317	no	no	2	0.0012541	76.465	4044000
FEELNNDLFR	10	0	1295.61	B7U9Z3	B7U9Z3	335	344	yes	yes	2	0.00027095	116.05	21114000
FEGDTLVNR	9	0	1049.51	BK;W6KDG8	BK	115	123	yes	no	1;2;3	0	217.02	8485600000
FEGDTLVNRIELK	13	1	1532.82	BK;W6KDG8	BK	115	127	yes	no	2;3	1.881e-10	92.856	69580000
FESLTDK	7	0	838.407	Q6UJX5;A0A0M4J345;D0EJY9;A0A0M3SBS3;A0A224ATS2;A0A0M4J3A8;Q6UJX6	Q6UJX5	48	54	yes	no	1	0.008483	90.777	7897000
FFQLYVYK	8	0	1106.58	E1AXT8	E1AXT8	126	133	yes	yes	2	0.0018853	73.039	5105900
FGLAPSANR	9	0	931.488	Q5EEQ1	Q5EEQ1	70	78	yes	yes	2	0.0020932	73.248	47408000
FGLAPSANRK	10	1	1059.58	Q5EEQ1	Q5EEQ1	70	79	yes	yes	2;3	0.0075453	48.157	28957000
FHWKPTCGVK	10	1	1258.63	K0IBB4;C6FFS2	K0IBB4	223	232	yes	no	2;3	0.0012691	59.245	5665500
FICTTGK	7	0	825.405	BK;W6KDG8	BK	47	53	yes	no	1;2	2.3909e-05	130.05	6670900000
FLDGIYVSEK	10	0	1169.6	H9A0G0	H9A0G0	103	112	yes	yes	2	0.0038283	74.376	7674300
FLKPSVAGFLLQK	13	1	1446.86	E5LLE7	E5LLE7	240	252	yes	yes	2;3	4.0813e-34	134.99	59471000
FPDMVHALKPNPK	13	1	1492.79	K0IBB4;C6FFS2	K0IBB4	150	162	yes	no	4	0.019703	20.009	12939000
FSTVIHER	8	0	987.514	K0IBB4;C6FFS2	K0IBB4	102	109	yes	no	2	0.0098928	101.6	83080000
FSVSGEGEGDATYGK	15	0	1502.65	BK;W6KDG8	BK	28	42	yes	no	2	0	215.08	18657000
FVIGGPHGDAGLTGR	15	0	1452.75	A0A248QJL3;A0A248QFH8;A0A248QEL2;A0A0F7R532;A0A1X9RIL3	A0A248QJL3	238	252	yes	no	2;3	2.2864e-05	74.962	23664000
FYKEEEKNEPEFAK	14	2	1786.84	E5LLE7	E5LLE7	197	210	yes	yes	2;3;4	6.7173e-34	133.05	84422000
FYLQPLTPAEAAQR	14	0	1603.84	Q5EFR5;I0B7K0;I0B7J9	Q5EFR5	117	130	yes	no	2;3	8.5409e-10	112.75	33883000
GEELFTGVVPILVELDGDVNGHK	23	0	2436.25	BK;W6KDG8	BK	5	27	yes	no	3	1.228e-05	39.288	7773500
GELGPIAAAR	10	0	953.529	A0A286RNF7	A0A286RNF7	85	94	yes	yes	2	0.010156	73.248	18181000
GGIETFLIER	10	0	1133.61	A0A0A8K9V3	A0A0A8K9V3	74	83	yes	yes	2	0.0054767	82.287	10351000
GGQEIYVGPLGR	12	0	1244.65	A0A0H5BGR8;A0A0H5AWB5;A0A0H5AZC4;A0A0H5AWE5;A0A0H5B1M6;A0A0H5AWF7	A0A0H5BGR8	1063	1074	yes	no	2	0.022578	42.743	3379500
GGSTGYDNAVALPAGGR	17	0	1561.75	Q58H58;I0B7J2;I0B7J1;I0B7J4	Q58H58	248	264	yes	no	2	5.613e-09	45.257	0
GGYFDNYGIIR	11	0	1273.61	F2Z9R2	F2Z9R2	321	331	yes	yes	2	0.021058	47.198	6577400
GIDFKEDGNILGHK	14	1	1541.78	BK;W6KDG8	BK	128	141	yes	no	2;3;4	0	272.65	4372100000
GIVDSEDLPLNISR	14	0	1526.79	Q6UJX5;A0A0M4J345;D0EJY9;A0A0M3SBS3;A0A224ATS2;A0A0M4J3A8;Q6UJX6	Q6UJX5	358	371	yes	no	2	4.0296e-90	194.17	37605000
GIYAYGFEKPSAIQQR	16	1	1826.93	H9A0F9;A0A173FEI6;A0A0P0INT0	H9A0F9	54	69	yes	no	3	0.0054798	32.815	5904000
GNINIEELRK	10	1	1184.65	E0X585	E0X585	15	24	yes	yes	3	0.017297	19.132	0
GPILLEDYHLVEK	13	0	1524.82	K0IBB4;C6FFS2	K0IBB4	37	49	yes	no	2;3	4.3574e-05	93.258	49020000
GTMTTTHSYTGDQR	14	0	1554.67	A0A0A8IBT8	A0A0A8IBT8	239	252	yes	yes	2;3	0	208.15	104080000
GVCSNFLCDLKPGAEVK	17	1	1892.91	A0A481NUV9	A0A481NUV9	178	194	yes	yes	2;3	1.0555e-09	72.496	8326300
GVSLLLPSDVVIADK	15	0	1524.88	E5LLE7	E5LLE7	336	350	yes	yes	2	3.3412e-11	135.6	94552000
GVTTIIGGGDSVAAVEK	17	0	1572.84	E5LLE7	E5LLE7	424	440	yes	yes	2	9.1832e-06	67.997	9607500
GYSFTTTAER	10	0	1131.52	Q8H1A1	Q8H1A1	9	18	yes	yes	2	1.1753e-09	124.23	88894000
HLTGEFEKK	9	1	1087.57	A0A387K3P5;A0A387K371;A0A387K109	A0A387K3P5	33	41	yes	no	3	0.023846	31.379	3430200
HMDGSGVHTFTLINK	15	0	1655.81	K0IBB4;C6FFS2	K0IBB4	200	214	yes	no	2;3	1.4026e-10	113.22	28936000
HNIEDGSVQLADHYQQNTPIGDGPVLLPDNHYLSTQSALSK	41	0	4471.17	BK;W6KDG8	BK	170	210	yes	no	4	1.5967e-54	61.608	20347000
HQLITATVNDGK	12	0	1295.68	Q58H59;I0B7J5;A0A4D6IA34	Q58H59	219	230	yes	no	2	0.00054156	60.641	5116700
IDHYLGK	7	0	844.444	F2Z9R2;F2Z9R3;F2Z9R1	F2Z9R2	273	279	yes	no	2	0.0082408	92.822	13660000
IDMSTTVLGFK	11	0	1210.63	E1AXT8	E1AXT8	59	69	yes	yes	2	4.2484e-05	63.283	4934000
IDYAPGGINPPHTHPR	16	0	1740.87	J7EUE8	J7EUE8	100	115	yes	yes	3	0.011143	26.808	16255000
IFLENVIR	8	0	1002.59	A0A0A7HI84	A0A0A7HI84	61	68	yes	yes	2	0.0024082	68.915	27685000
IGATSDLRPVQK	12	1	1283.72	Q84V57	Q84V57	466	477	yes	yes	3	0.0034262	34.264	22394000
IGGIGTVPVGR	11	0	1024.6	Q6XX19	Q6XX19	180	190	yes	yes	2	3.2067e-06	110.87	231210000
IGINGFGR	8	0	832.456	A0A0F7JIC2;A0A0F7JJ49;A0A0F7JLU6	A0A0F7JIC2	6	13	yes	no	2	0.015024	79.939	18960000
IIGFDNVR	8	0	932.508	Q8SAQ3;A0A0S4IJL0	A0A0S4IJL0	158	165	no	no	1;2	2.9407e-05	124.34	1874300000
IIGQDEAVK	9	0	971.529	A0A088F9I1;A0A088FCE7;A0A088F8F4;A0A088F8L1	A0A088F9I1	591	599	yes	no	2	4.3638e-17	76.478	0
IINEPTAAAIAYGLDK	16	0	1658.89	A0A1W5XFS7;B7U9Z3	A0A1W5XFS7	176	191	no	no	2;3	2.7846e-16	128.9	186650000
IINEPTAAAIAYGLDKK	17	1	1786.98	A0A1W5XFS7;B7U9Z3	A0A1W5XFS7	176	192	no	no	2;3	1.3553e-16	108.59	120890000
IKDAVVTVPAYFNDAQR	17	1	1905.99	B7U9Z3	B7U9Z3	173	189	yes	yes	2;3	1.5848e-15	101.32	19862000
ILDEIR	6	0	757.433	Q5TIM6	Q5TIM6	87	92	yes	yes	2	8.7695e-09	75.131	0
IMEYFIK	7	0	942.488	B7U9Z3	B7U9Z3	270	276	yes	yes	1;2	0.015271	56.091	15266000
INPSEHKQLK	10	1	1192.66	A0A173DW85	A0A173DW85	255	264	yes	yes	2	0.0024031	53.166	0
IPVFLDGGVR	10	0	1071.61	E1AXT8	E1AXT8	281	290	yes	yes	2	0.016126	67.494	17226000
IQDKEGIPPDQQR	13	1	1522.77	B8R518;B8R519;Q5EC25	B8R518	18	30	yes	no	2;3	5.6298e-160	177.1	195450000
ISGLIYEETR	10	0	1179.61	A0A0A7HI84	A0A0A7HI84	47	56	yes	yes	2	0.00064662	100.57	35390000
ISGLTSQATR	10	0	1032.56	Q2LFC3;Q2LFC4;A0A0H3W5K5;A0A7M1C899;A0A515KZ11;A0A0H3W562;A0A7M4BIM2;A0A515KYM7	Q2LFC3	364	373	yes	no	2	0.0052825	73.196	6394900
ITIKPQTDR	9	1	1070.61	I3QHX5;A0A0F7R5Z5;B6EBE6	I3QHX5	369	377	yes	no	3	0.012841	36.318	12209000
ITITNDKGR	9	1	1016.56	A0A1W5XFS7;B7U9Z3	A0A1W5XFS7	507	515	no	no	2	0.02372	107.29	6274000
ITPSWVAFTDGER	13	0	1477.72	B7U9Z3	B7U9Z3	70	82	yes	yes	2	0.0061437	54.471	34671000
ITYEIR	6	0	793.433	K0IBB4;C6FFS2	K0IBB4	458	463	yes	no	2	2.1279e-20	142.63	114130000
IWHHTFYNELR	11	0	1514.74	H9C954	H9C954	75	85	yes	yes	2;3;4	2.4481e-05	84.213	49634000
KAEQWNVEVY	10	1	1264.61	A0A481NUV9	A0A481NUV9	353	362	yes	yes	2	0.019416	51.066	24795000
KAVENSPFLEK	11	1	1260.67	Q6UJX5;A0A0M4J345;D0EJY9;A0A0M3SBS3;A0A224ATS2;A0A0M4J3A8;Q6UJX6	Q6UJX5	471	481	yes	no	2	0.0085666	89.731	5185700
KAYPQAWIR	9	1	1131.62	A0A0S4IJL0	A0A0S4IJL0	149	157	yes	yes	2;3	0.010097	54.611	8776400
KDSPLDVIAINDTGGVK	17	1	1740.93	A0A0A8IBT8	A0A0A8IBT8	89	105	yes	yes	2;3	8.9198e-09	73.927	55175000
KPEEITKEEYAAFYK	15	2	1844.92	Q6UJX5;A0A0M4J345;D0EJY9;A0A0M3SBS3;A0A0M4J3A8	Q6UJX5	271	285	yes	no	2	6.9338e-29	130.1	5706400
KTFAEEVNAAFR	12	1	1381.7	A0A0A8IBT8	A0A0A8IBT8	317	328	yes	yes	2;3	8.5853e-11	145.99	47764000
KVEAELVALK	10	1	1098.66	K7ZLE1	K7ZLE1	289	298	yes	yes	2	0.018146	52.49	2891700
KVIISAPSK	9	1	941.591	A0A0F7JIC2;A0A0F7JJ49	A0A0F7JIC2	120	128	yes	no	2	0.012654	83.456	10472000
KVLITAPGK	9	1	925.596	A0A0A8IBT8	A0A0A8IBT8	183	191	yes	yes	1;2	0.010033	93.267	76147000
LAEEGKLDPVVGR	13	1	1381.76	A0A088F9I1;A0A088FCE7;A0A088F8F4	A0A088F9I1	275	287	yes	no	2	0.00082988	47.971	0
LALSDVPFK	9	0	988.559	F2VJF4;C9DFA9	F2VJF4	191	199	yes	no	2	0.017506	62.546	18630000
LASLADLYVNDAFGTAHR	18	0	1932.97	E5LLE7	E5LLE7	212	229	yes	yes	2;3	0.0013741	66.989	14542000
LAVNTIGSLVR	11	0	1141.68	A0A0A8K9V3	A0A0A8K9V3	441	451	yes	yes	2	0.00030056	75.378	9628800
LDFAVSR	7	0	806.429	A0A481NUV9	A0A481NUV9	277	283	yes	yes	2	3.921e-16	110.63	171130000
LDGDAALNK	9	0	915.466	A0A224AKY6;Q5EEY5;Q84UV7	A0A224AKY6	306	314	yes	no	2	0.0018855	71.296	111270000
LELAQYR	7	0	891.481	A0A6H0CCF4	A0A6H0CCF4	395	401	yes	yes	2	0.023525	79.454	121600000
LEYNYNSHNVYIMADK	16	0	1972.9	BK;W6KDG8	BK	142	157	yes	no	2;3	7.0123e-248	198.78	1907200000
LEYNYNSHNVYIMADKQK	18	1	2229.05	BK;W6KDG8	BK	142	159	yes	no	2;3;4	1.0829e-36	123.76	282900000
LGIHEDSQNR	10	0	1167.56	Q6UJX5;A0A0M4J345;D0EJY9;A0A0M3SBS3;A0A224ATS2;A0A0M4J3A8;Q6UJX6	Q6UJX5	418	427	yes	no	2;3	5.6728e-05	116.52	13177000
LGPNYLQLPANAPK	14	0	1494.82	K0IBB4;C6FFS2	K0IBB4	355	368	yes	no	2;3	2.972e-139	219.8	56413000
LIYTNDKGEEVK	12	1	1407.72	A0A481NUV9	A0A481NUV9	166	177	yes	yes	2;3	2.9504e-19	130.23	158970000
LLEELERGEK	10	1	1214.65	V5KY72	V5KY72	21	30	yes	yes	2;3	0.00093555	59.245	23123000
LLLDAIEGER	10	0	1127.62	F2Z9R2;F2Z9R3	F2Z9R2	518	527	yes	no	2	0.0034774	62.582	8309400
LLLIGDSGVGK	11	0	1070.63	I1Y996	I1Y996	18	28	yes	yes	2	0.0025212	70.056	10423000
LLSEKGELGPIAAAR	15	1	1523.87	A0A286RNF7	A0A286RNF7	80	94	yes	yes	3	0.012377	25.965	3961200
LNGIALR	7	0	755.465	A0A0A8IBT8	A0A0A8IBT8	293	299	yes	yes	2	3.4662e-16	110.23	55115000
LPLQDVYK	8	0	974.544	Q6XX19	Q6XX19	172	179	yes	yes	1;2	1.6535e-10	113.41	175200000
LQIWDTAGQER	11	0	1315.65	I1Y996;C9DFA5	I1Y996	66	76	yes	no	2	0.0037729	74.162	76329000
LSELLGIQVVK	11	0	1197.73	E5LLE7	E5LLE7	158	168	yes	yes	2	1.1122e-31	138.4	26381000
LSKEEIEK	8	1	974.528	A0A1W5XFS7	A0A1W5XFS7	516	523	yes	yes	2	0.00011007	130.31	10539000
LSQEEIER	8	0	1002.5	B7U9Z3	B7U9Z3	543	550	yes	yes	2	0.021249	103.35	48407000
LTGMAFR	7	0	794.411	A0A0F7JIC2;A0A0F7JJ49;A0A0F7JLU6	A0A0F7JIC2	230	236	yes	no	2	6.515e-17	107.74	354070000
LVIVGDGGTGK	11	0	1014.57	A0A387K3P5;A0A387K371;A0A387K109	A0A387K3P5	16	26	yes	no	2	0.00059979	78.098	18073000
LVLPGELAK	9	0	938.58	A2IBL2;A0A219V415	A2IBL2	123	131	yes	no	2	0.02192	81.296	88115000
LWDLQAGTTAR	11	0	1230.64	A0A455QYV0;C5MTW1	A0A455QYV0	90	100	yes	no	2	0.0098171	62.823	3731700
LYPAYTDDPTVPNGSITPTFSAAALFINNARWDGVPFLMK	40	1	4370.17	F2Z9R2	F2Z9R2	391	430	yes	yes	4	0.018619	1.1123	4293600
LYSIASSALGDFGDSK	16	0	1629.79	A0A481NUV9	A0A481NUV9	142	157	yes	yes	2;3	2.4483e-73	178.32	215210000
MIQIPLEDLPSK	12	0	1382.75	K7ZLE1	K7ZLE1	268	279	yes	yes	2	0.00033783	60.518	2946800
MPLDRISQYER	11	1	1406.7	A0A6H0CCF4	A0A6H0CCF4	459	469	yes	yes	4	0.019716	16.942	3393200
MVNHFVQEFK	10	0	1277.62	A0A1W5XFS7	A0A1W5XFS7	243	252	yes	yes	2;3	0.00021892	92.051	144280000
MYIQTR	6	0	810.406	A0A481NUV9	A0A481NUV9	293	298	yes	yes	2	0.00073749	131.65	77604000
NALENYAYNMR	11	0	1357.61	A0A1W5XFS7;Q769C6;Q769C4	A0A1W5XFS7	546	556	no	no	2	0.00074052	76.827	22050000
NALENYSYNMR	11	0	1373.6	Q6L9F6	Q6L9F6	278	288	yes	yes	2	0.00092512	61.161	5272100
NAVVTVPAYFNDSQR	15	0	1679.83	A0A1W5XFS7;C9DFB9;D4P5A4	A0A1W5XFS7	145	159	yes	no	2;3	0	213.63	57386000
NFEGLDLGK	9	0	991.497	E1AXT8	E1AXT8	183	191	yes	yes	2	0.0061642	65.88	10610000
NGHVEIIANDQGNR	14	0	1535.74	B7U9Z3	B7U9Z3	56	69	yes	yes	2;3	1.1661e-33	72.652	0
NGIKVNFK	8	1	918.529	BK;W6KDG8	BK	160	167	yes	no	2	0.0051046	117.16	29133000
NHIVTEWDAPR	11	0	1336.65	E1AXT8	E1AXT8	353	363	yes	yes	3	0.0048492	25.014	0
NIANMVPAYDK	11	0	1234.6	A0A286RNF7;A4D0J9;A4D0K0	A0A286RNF7	175	185	yes	no	1;2	2.3023e-10	120.68	189340000
NLQYYEISAK	10	0	1227.61	A0A387K3P5;A0A387K371	A0A387K3P5	146	155	yes	no	2	0.0020538	88.948	16538000
NPALYGELSK	10	0	1090.57	A0A286RNF7	A0A286RNF7	132	141	yes	yes	2	2.6364e-07	144.5	221160000
NQVAMNPINTVFDAK	15	0	1660.82	A0A1W5XFS7;C9DFB9;D4P5A4	A0A1W5XFS7	60	74	yes	no	2	6.0175e-26	133.05	34458000
NQVAMNPINTVFDAKR	16	1	1816.93	A0A1W5XFS7;C9DFB9;D4P5A4	A0A1W5XFS7	60	75	yes	no	3	0.0055577	25.558	2847300
NSLETYVYNMR	11	0	1388.64	B7U9Z3	B7U9Z3	573	583	yes	yes	2	0.0073568	74.173	6599700
NTAGIEPEDVAK	12	0	1242.61	E0X585	E0X585	216	227	yes	yes	2	0.00084179	75.229	10580000
NVIVDFGEQILSVSIDVPGDETYSFQPR	28	0	3123.54	A0A224AKY6;Q5EEY5;Q8LKF9	A0A224AKY6	196	223	yes	no	6	0.018706	0.076998	15388000
NYELPDGQVITIGAER	16	0	1773.89	H9C954	H9C954	229	244	yes	yes	2	6.3412e-19	146.79	41821000
QHDFFK	6	0	820.387	BK	BK	81	86	yes	yes	1;2	5.3169e-31	151.17	593830000
QMSLLLR	7	0	859.495	A0A6H0CCF4	A0A6H0CCF4	283	289	yes	yes	2	0.010294	50.539	0
QVHPDIGISSK	11	0	1179.62	A2IBL2;A0A219V415	A2IBL2	70	80	yes	no	2;3	1.4438e-05	101.66	51299000
QVQCISFIAYKPEGY	15	1	1801.87	A0A0S4IJL0	A0A0S4IJL0	166	180	yes	yes	2;3	4.9871e-11	119.76	61552000
RDELTLEGIK	10	1	1172.64	H9A0F9;A0A173FEI6;A0A0P0INT0	H9A0F9	245	254	yes	no	2	0.021445	59.35	6236700
RLALSDVPFK	10	1	1144.66	F2VJF4;C9DFA9	F2VJF4	190	199	yes	no	3	0.010798	26.118	3579600
RLIYTNDKGEEVK	13	2	1563.83	A0A481NUV9	A0A481NUV9	165	177	yes	yes	3	0.017984	41.577	11889000
RLTFDEIQSK	10	1	1235.65	Q58H58;I0B7J2;I0B7J1	Q58H58	91	100	yes	no	3	0.0038622	44.847	3782300
RPFAAIVGGSK	11	1	1101.63	E5LLE7	E5LLE7	266	276	yes	yes	2;3	5.2952e-79	158.47	95812000
SALGLSEGGPLFGFTK	16	0	1579.82	Q2LAH1;Q2LAH0	Q2LAH1	186	201	yes	no	2	9.2701e-09	74.46	12712000
SAMPEGYVQER	11	0	1265.57	BK;W6KDG8	BK	87	97	yes	no	2	8.9139e-41	143.03	3729300000
SFTPDR	6	0	721.34	K0IBB4;C6FFS2	K0IBB4	436	441	yes	no	2	7.0855e-55	99.279	0
SFTPDRQER	9	1	1134.54	K0IBB4;C6FFS2	K0IBB4	436	444	yes	no	2	0.011758	55.549	4193100
SGAYIVR	7	0	764.418	A0A248QJL3;A0A248QFH8;A0A248QEL2;A0A0F7R532	A0A248QJL3	281	287	yes	no	2	0.021574	65.672	30060000
SGDEMTSLKDYVTR	14	1	1600.74	Q6UJX5;A0A0M4J345;D0EJY9;A0A0M3SBS3;A0A224ATS2;Q6UJX6	Q6UJX5	441	454	yes	no	2	1.8682e-09	48.004	0
SGGLGDLNYPLISDVTK	17	0	1747.9	R9W4N2	R9W4N2	159	175	yes	yes	2	9.5567e-09	79.639	3421800
SHIQENWR	8	0	1068.51	K0IBB4;C6FFS2	K0IBB4	163	170	yes	no	2;3	0.0032639	127.56	60799000
SLDIERPTYTNLNR	14	1	1690.86	A0A0S0N5Y9	A0A0S0N5Y9	216	229	yes	yes	3	0.015085	26.148	16191000
SLIVWSLTK	9	0	1045.62	A0A455QYV0	A0A455QYV0	40	48	yes	yes	2	0.0039348	66.692	2361000
SLLEDEAAR	9	0	1002.5	K0IBB4;C6FFS2	K0IBB4	233	241	yes	no	2	0.010386	91.069	54657000
SLYTAGPLPFVQK	13	0	1419.78	Q2LFC3;Q2LFC4;A0A0H3W5K5;A0A7M1C899;A0A515KZ11;A0A0H3W562;A0A7M4BIM2;A0A515KYM7	Q2LFC3	180	192	yes	no	2	0.02181	51.092	6926900
SPGYYDGR	8	0	913.393	A0A0S4IJL0	A0A0S4IJL0	115	122	yes	yes	2	7.8356e-77	160.78	210600000
SQPGEVVKPDQFK	13	1	1457.75	U5PY93;U5Q1Q7;U5PY20;U5HUF9	U5PY93	302	314	yes	no	2	3.1313e-09	49.5	0
SSAKQKAICETTTPTVDEISLGVGDMGFNSEQNDGWEVYAR	41	2	4490.06	X4YFK1	X4YFK1	10	50	yes	yes	7	0.0045591	1.1405e-11	2620800
STIHDVVLVGGSTR	14	0	1439.77	A0A1W5XFS7	A0A1W5XFS7	335	348	yes	yes	2;3	8.8644e-10	89.805	39143000
STNLDWYK	8	0	1025.48	Q6XX19	Q6XX19	141	148	yes	yes	2	0.00812	78.77	40941000
SVGDLTAAELK	11	0	1102.59	E5LLE7	E5LLE7	80	90	yes	yes	2	3.4979e-05	88.681	51868000
SYNVLIPDQGIALR	14	0	1557.85	R9W4N2	R9W4N2	180	193	yes	yes	2	0.0029684	44.82	20230000
TAIAIDTILNQK	12	0	1299.74	A0A6H0CCF4	A0A6H0CCF4	178	189	yes	yes	2	9.71e-20	132.01	15387000
TFAEEVNAAFR	11	0	1253.6	A0A0A8IBT8	A0A0A8IBT8	318	328	yes	yes	2;3	1.2669e-51	175.51	144210000
TFNDALDTTK	10	0	1124.54	E5LLE7	E5LLE7	381	390	yes	yes	2	0.00022499	116.52	31539000
TGIDYYILPVVR	12	0	1407.78	F2VJF4	F2VJF4	41	52	yes	yes	2	8.1526e-06	108.57	21373000
TGSIVDVPAGK	11	0	1042.57	A0A6H0CCF4	A0A6H0CCF4	93	103	yes	yes	2	0.00021327	42.395	0
TIFFKDDGNYK	11	1	1346.65	BK;W6KDG8	BK	98	108	yes	no	1;2;3	0	206.43	6059300000
TIFFKDDGNYKTR	13	2	1603.8	BK;W6KDG8	BK	98	110	yes	no	2;3;4	3.3578e-13	67.726	23476000
TISDLDHAAK	10	0	1069.54	Q5EFR5;I0B7K0;I0B7J9	Q5EFR5	193	202	yes	no	3	0.010176	30.889	24014000
TLADYNIQK	9	0	1064.55	B8R518;B8R519;Q5EC25	B8R518	43	51	yes	no	1;2	0.0020916	101.64	654290000
TLLFGEK	7	0	806.454	A0A0F7JIC2;A0A0F7JJ49;A0A0F7JLU6	A0A0F7JIC2	68	74	yes	no	2	0.01509	81.784	48997000
TLYGFGG	7	0	713.338	A0A0A7HI84	A0A0A7HI84	97	103	yes	yes	1	0.013628	77.906	19705000
TPEEIR	6	0	743.381	Q84UV6;A0A0K0PU31;A0A0K0PTC5	Q84UV6	122	127	yes	no	2	0.00019825	68.398	0
TTLLLALAGK	10	0	999.633	A0A0H5BGR8;A0A0H5AWB5;A0A0H5AZC4;A0A0H5AWE5;A0A0H5B1M6	A0A0H5BGR8	201	210	no	no	2	0.01141	59.245	4612700
TTPSYVGFTDTER	13	0	1472.68	A0A1W5XFS7;C9DFB9	A0A1W5XFS7	40	52	yes	no	2	6.1122e-10	99.343	33816000
TVGGGDDAFNTFFSETGAGK	20	0	1976.88	A0A0S0N5Y9	A0A0S0N5Y9	41	60	yes	yes	2	1.0502e-54	132.86	15740000
TVTAMDVVYALK	12	0	1309.7	A0A0A7HI84	A0A0A7HI84	81	92	yes	yes	2	0.0063753	49.472	14660000
TVTAMDVVYALKR	13	1	1465.8	A0A0A7HI84	A0A0A7HI84	81	93	yes	yes	3	0.023787	13.119	5982600
TWPEDILPLQPVGR	14	0	1619.87	K0IBB4;C6FFS2	K0IBB4	291	304	yes	no	2	1.4059e-05	72.434	7037900
VAIGQVLLSVR	11	0	1153.72	D2DWL6	D2DWL6	129	139	yes	yes	2	0.0082744	68.893	9304300
VAINGFGR	8	0	832.456	A0A0A8IBT8	A0A0A8IBT8	69	76	yes	yes	2	1.4305e-12	132.94	64280000
VALVAGYGDVGK	12	0	1147.62	I3QHX5;A0A0F7R5Z5	I3QHX5	264	275	yes	no	2	2.9788e-05	51.436	0
VAPEEHPVLLTEAPLNPK	18	0	1953.06	H9C954	H9C954	86	103	yes	yes	2;3	2.2919e-17	104.17	209710000
VAVVGGGPAGGAAAETLAK	19	0	1594.87	A0A0A8K9V3	A0A0A8K9V3	55	73	yes	yes	2	2.6904e-07	45.28	9524500
VCENIPIVLCGNK	13	0	1514.76	A0A387K3P5;A0A387K371;A0A387K109	A0A387K3P5	114	126	yes	no	2	2.616e-10	59.426	0
VCPSHILNFQPGEAFVVR	18	0	2069.05	A0A286RNF7;A4D0J9;A4D0K0	A0A286RNF7	157	174	yes	no	3	6.2903e-14	39.905	12100000
VEDDLIWIPGYFDPEYQSSR	20	0	2428.12	A0A385HBR6	A0A385HBR6	225	244	yes	yes	6	0.0062475	3.0979	10875000
VEIIANDQGNR	11	0	1227.62	A0A1W5XFS7;C9DFB9	A0A1W5XFS7	29	39	yes	no	2	5.6997e-52	149.72	69414000
VGIDFPSIEVR	11	0	1230.66	A0A0H5BGR8;A0A0H5AWB5	A0A0H5BGR8	119	129	yes	no	2	0.011796	34.721	0
VGSDLSAFYR	10	0	1113.55	Q84V57	Q84V57	379	388	yes	yes	2	0.005237	73.233	7502700
VIAWYDNEWGYSQR	14	0	1785.81	A0A0A8IBT8	A0A0A8IBT8	375	388	yes	yes	2	1.0312e-34	137.17	18952000
VILSTHLGRPK	11	1	1219.74	E5LLE7	E5LLE7	133	143	yes	yes	2;3	0.0064109	56.563	34367000
VIQVVSDR	8	0	914.519	A0A0A8IBT8	A0A0A8IBT8	138	145	yes	yes	2	1.2187e-12	133.6	130040000
VITSATEAQAYTPGR	15	0	1563.79	Q84V57	Q84V57	546	560	yes	yes	2	0.00020874	47.712	6475800
VLENLGADPSNIR	13	0	1396.73	A0A088F9I1	A0A088F9I1	213	225	yes	yes	2	6.7897e-05	57.348	7067500
VLITAPGK	8	0	797.501	A0A0A8IBT8	A0A0A8IBT8	184	191	yes	yes	1	0.0032549	104.21	29295000
VLITTDLLAR	10	0	1113.68	H9A0F9;A0A173FEI6;A0A0P0INT0	H9A0F9	332	341	yes	no	2	0.00080821	76.827	22877000
VLPALNGK	8	0	810.496	A0A0F7JIC2;A0A0F7JLU6;H9C955	A0A0F7JIC2	222	229	yes	no	2	0.0037841	78.994	8880400
VPGLNTLGVSLSR	13	0	1311.75	J7EUE8	J7EUE8	87	99	yes	yes	2	0.0011214	58.676	45080000
VPTVDVSVVDLTVR	14	0	1497.84	A0A0F7JIC2;A0A0F7JJ49;A0A0F7JLU6	A0A0F7JIC2	237	250	yes	no	2	4.7684e-75	153.95	16618000
VSLEDLYSGITK	12	0	1323.69	U5Q1N6;U5PYM4	U5Q1N6	127	138	yes	no	2	0.0048488	62.408	9377300
VSLEDLYSGTSK	12	0	1297.64	U5PY93;A0A8A1L3A8	U5PY93	127	138	yes	no	2	0.00025647	39.917	0
VVAPPER	7	0	766.434	H9C954	H9C954	319	325	yes	yes	2	0.013808	94.407	43518000
VVDEGYNPSYGAR	13	0	1425.65	A0A088F9I1;A0A088FCE7;A0A088F8F4;A0A088F8L1	A0A088F9I1	835	847	yes	no	2	0.021552	41.689	10238000
VVDGLGVPIDGR	12	0	1195.66	A0A6H0CCF4	A0A6H0CCF4	109	120	yes	yes	2	0.0053941	51.268	9250000
VVDLADIVANQWK	13	0	1469.79	A0A0A8IBT8	A0A0A8IBT8	389	401	yes	yes	2;3	2.6948e-160	209.1	60631000
VVSVGDGIAR	10	0	971.54	A0A6H0CCF4	A0A6H0CCF4	33	42	yes	yes	2	0.01106	72.879	19051000
VWVLLLWIGIMAGLFTWK	18	0	2145.22	A0A1V1H612;Q84KK7	A0A1V1H612	371	388	yes	no	6	0.0051388	0.066017	8952200
WVEALSDPR	9	0	1071.53	K0IBB4;C6FFS2	K0IBB4	449	457	yes	no	2	0.00013428	96.948	35143000
YDSTLGIFDADVKPVGTDGISVDGK	25	1	2568.26	A0A0A8IBT8	A0A0A8IBT8	113	137	yes	yes	2;3	9.3503e-42	76.471	21696000
YDSVHGQWK	9	0	1118.51	A0A0F7JIC2;A0A0F7JJ49;A0A0F7JLU6	A0A0F7JIC2	49	57	yes	no	2	0.018329	90.709	12690000
YEKNPALYGELSK	13	1	1510.77	A0A286RNF7	A0A286RNF7	129	141	yes	yes	3	0.0003614	48.177	31918000
YFITIGGNEGNPGR	14	0	1493.73	F2VJF4;C9DFA9	F2VJF4	132	145	yes	no	2	2.8754e-09	104.43	12554000
YMVFACSDSR	10	0	1234.51	A0A286RNF7	A0A286RNF7	147	156	yes	yes	2	0.0024011	78.934	29552000
YNKKPTITSR	10	2	1206.67	A2IBL2;A0A219V415	A2IBL2	106	115	yes	no	3	0.023405	22.046	4600200
YPDHMKQHDFFK	12	1	1591.72	BK	BK	75	86	yes	yes	2;3	1.21e-11	122.69	61139000
YSLAPLVPR	9	0	1014.59	E5LLE7	E5LLE7	149	157	yes	yes	2	6.4586e-93	166.05	64066000
YYAETVSTLNDVLAK	15	0	1685.85	Q5EFR5;I0B7K0;I0B7J9	Q5EFR5	212	226	yes	no	2	5.0279e-11	111.63	16300000
YYCTVIDAPGHR	12	0	1450.67	Q6XX19	Q6XX19	21	32	yes	yes	2;3	1.6629e-06	72.643	46753000
YYEILGVPK	9	0	1080.59	U5PY93;U5Q1Q7;U5PY20;A0A8A1L3A8;U5HUF9;U5Q1N6	U5PY93	14	22	no	no	2	0.018654	73.26	4468800
